# Supplementary material for: Five-Repetition Sit-to-Stand Test Performance in Healthy Individuals: Reference Values and Predictors From 2 Prospective Cohorts
Source: PubMed Central journal article supplement — Neurospine. 2021 Dec 31;18(4):760–9. doi: 10.14245/ns.2142750.375 (PMC8752709; doi:10.14245/ns.2142750.375), 2021-12-31
Supplement: ns-2142750-375-suppl2.pdf [file ns-2142750-375-suppl2.pdf]

**Supplementary Table 1.** Reference values for the 5R-STS test time (second) in healthy individuals  $\leq 60$  years of age

| Age (yr) | Male            |      | Female          |      | Overall         |      |
|----------|-----------------|------|-----------------|------|-----------------|------|
|          | Mean $\pm$ SD   | ULN  | Mean $\pm$ SD   | ULN  | Mean $\pm$ SD   | ULN  |
| 20-30 yr | 5.24 $\pm$ 1.36 | 8.15 | 5.18 $\pm$ 1.08 | 7.59 | 5.20 $\pm$ 1.18 | 8.13 |
| 31-40 yr | 5.89 $\pm$ 1.10 | 7.49 | 5.60 $\pm$ 1.68 | 9.01 | 5.73 $\pm$ 1.47 | 9.0  |
| 41-50 yr | 7.01 $\pm$ 1.88 | 8.49 | 5.91 $\pm$ 1.19 | 7.66 | 6.46 $\pm$ 1.25 | 8.48 |
| 51-60 yr | 7.02 $\pm$ 1.44 | 8.91 | 6.64 $\pm$ 1.82 | 8.83 | 6.83 $\pm$ 1.63 | 8.95 |

Mean  $\pm$  standard deviation (SD) and ULN (upper limits of normal) are provided for each subpopulation. 5R-STS, 5-repetition sit-to-stand test.
